# Supplementary material
Source: PubMed Central journal article supplement (PMC1758034)
Supplement: qualsafety_12_6_411_v2_1.pdf [file qualsafety_12_6_411_v2_1.pdf]

# **CONFIDENTIAL**

## **MODULAR REVIEW FORM (MRF2)**

**for**

## **Retrospective Case Record Review**

Directions:

1. Complete stage A in full
2. Complete stage B in full
3. Complete the relevant subsection(s) in Stage C (as identified in A7)
4. Complete the relevant subsection(s) in Stage D (as identified in Stage C)
5. Complete stage E in full
6. "AE" means adverse event
7. Please print or write responses or notes legibly
8. Please return this form to the team leader on completion
9. A manual is available with definitions

**Stage A: PATIENT INFORMATION AND BACKGROUND TO ADVERSE EVENT**

**A1 REVIEWER INFORMATION**

Date of Review:        
d d m m y y

Reviewer ID Number:

Time Commenced Review:

Case Number:

Time Review Finished:      
(use 24 hour clock)

**A2 PATIENT INFORMATION**

Patient's age:     Sex: M/F   Pregnancy: Yes/No

Date of Admission:

Date of Discharge:

or Date of Death d d m m y y

Degree of emergency at time of admission

1 Critical (life at risk)  3 Semi-urgent  
 2 Urgent (emergency)  4 Routine (non-urgent / waiting list)

**A3 NATURE OF ILLNESS** Primary diagnosis \_\_\_\_\_

**Prognosis from the primary illness?** To answer tick relevant **Yes** or **No** responses to **3A**, **3B** and **3C**

| 3A Complete recovery back to patient's normal health     | 3B Recovery with residual disability                     | 3C Terminal illness                                      |
|----------------------------------------------------------|----------------------------------------------------------|----------------------------------------------------------|
| <input type="checkbox"/> Yes <input type="checkbox"/> No | <input type="checkbox"/> Yes <input type="checkbox"/> No | <input type="checkbox"/> Yes <input type="checkbox"/> No |
| If <b>yes</b> , then complete recovery is:               | If <b>yes</b> , then recovery is:                        | If <b>yes</b> , the prognosis is:                        |
| <input type="checkbox"/> 1 Probable                      | <input type="checkbox"/> 1 Non-progressive               | <input type="checkbox"/> 1 Likely to die this admission  |
| <input type="checkbox"/> 2 More likely than not          | <input type="checkbox"/> 2 Slowly progressive            | <input type="checkbox"/> 2 Likely to die within 3 month  |
| <input type="checkbox"/> 3 Possible (20-50% chance)      | <input type="checkbox"/> 3 Rapidly progressive           | <input type="checkbox"/> 3 Expected to survive >3 month  |
| <input type="checkbox"/> 4 Unlikely                      |                                                          |                                                          |

**A4 CO-MORBIDITIES**

Please tick all of the following co-morbidities that apply to this patient **or**  **No co-morbidities**  **Not known**

|                                                                                                                                                                                                                                                                                                                                                                                                                                                                                                                                                                                                                                                                                                                                                                                                                                                                                                                                                                                                                                                                                                                                                                                                                                                                                                                                                                                                                                                                                                                                                              |                                                                                                                                                                                                                                                                                                                                                                                                                                                                                                                                                                                                                                                                                                                                                                                                                                                                                                                                                                                                                                                                                                                                                                                                                                                                                                                                                                                                              |
|--------------------------------------------------------------------------------------------------------------------------------------------------------------------------------------------------------------------------------------------------------------------------------------------------------------------------------------------------------------------------------------------------------------------------------------------------------------------------------------------------------------------------------------------------------------------------------------------------------------------------------------------------------------------------------------------------------------------------------------------------------------------------------------------------------------------------------------------------------------------------------------------------------------------------------------------------------------------------------------------------------------------------------------------------------------------------------------------------------------------------------------------------------------------------------------------------------------------------------------------------------------------------------------------------------------------------------------------------------------------------------------------------------------------------------------------------------------------------------------------------------------------------------------------------------------|--------------------------------------------------------------------------------------------------------------------------------------------------------------------------------------------------------------------------------------------------------------------------------------------------------------------------------------------------------------------------------------------------------------------------------------------------------------------------------------------------------------------------------------------------------------------------------------------------------------------------------------------------------------------------------------------------------------------------------------------------------------------------------------------------------------------------------------------------------------------------------------------------------------------------------------------------------------------------------------------------------------------------------------------------------------------------------------------------------------------------------------------------------------------------------------------------------------------------------------------------------------------------------------------------------------------------------------------------------------------------------------------------------------|
| <p><b>Cardio-vascular</b></p> <p><input type="checkbox"/> Coronary artery disease</p> <p><input type="checkbox"/> Peripheral vascular disease</p> <p><input type="checkbox"/> Cardiac insufficiency or dysrhythmia</p> <p><input type="checkbox"/> Hypertension</p> <p><b>Respiratory</b></p> <p><input type="checkbox"/> Asthma</p> <p><input type="checkbox"/> COPD (chronic obstructive pulmonary disease)</p> <p><input type="checkbox"/> Other serious lung problem (e.g. <i>severe tuberculous scarring, pneumectomy</i>) (specify) _____</p> <p><b>Gastro-intestinal</b></p> <p><input type="checkbox"/> Chronic or recurrent dyspepsia</p> <p><input type="checkbox"/> Inflammatory bowel disease Crohn's / colitis</p> <p><input type="checkbox"/> Chronic liver disorder</p> <p><b>Endocrine</b></p> <p><input type="checkbox"/> Diabetes</p> <p><input type="checkbox"/> Endocrine disorder (e.g. <i>thyroid, adrenal</i>) (specify) _____</p> <p><b>Neurological</b></p> <p><input type="checkbox"/> Epilepsy</p> <p><input type="checkbox"/> Stroke</p> <p><input type="checkbox"/> Parkinson's</p> <p><input type="checkbox"/> Dementia</p> <p><input type="checkbox"/> Other serious neurological disorders (e.g. <i>MS, MND</i>) (specify) _____</p> <p><b>Renal</b></p> <p><input type="checkbox"/> Chronic renal disease</p> <p><b>Haematological</b></p> <p><input type="checkbox"/> Anaemia</p> <p><input type="checkbox"/> Leukaemia</p> <p><input type="checkbox"/> Lymphoma</p> <p><input type="checkbox"/> Other (specify) _____</p> | <p><b>Existing cancer</b></p> <p><input type="checkbox"/> Specify _____</p> <p><b>Bone/joint disorders</b></p> <p><input type="checkbox"/> Osteoporosis</p> <p><input type="checkbox"/> Severe rheumatoid arthritis</p> <p><input type="checkbox"/> Severe osteoarthritis</p> <p><b>Disability</b></p> <p><input type="checkbox"/> Wheel chair bound</p> <p><input type="checkbox"/> Blind</p> <p><input type="checkbox"/> Deaf</p> <p><input type="checkbox"/> Learning difficulty</p> <p><input type="checkbox"/> Other (specify) _____</p> <p><b>Psychiatric</b></p> <p><input type="checkbox"/> Schizophrenia</p> <p><input type="checkbox"/> Affective disorder</p> <p><input type="checkbox"/> Other (specify) _____</p> <p><b>Psychosocial</b></p> <p><input type="checkbox"/> Alcoholism</p> <p><input type="checkbox"/> Drug abuse</p> <p><input type="checkbox"/> Smoker</p> <p><input type="checkbox"/> Homeless</p> <p><input type="checkbox"/> Other (specify) _____</p> <p><b>Infection</b></p> <p><input type="checkbox"/> AIDS</p> <p><input type="checkbox"/> Chronic infection (e.g. <i>Hep C, MRSA</i>) (specify) _____</p> <p><b>Trauma</b></p> <p><input type="checkbox"/> Multiple Traumas (e.g. <i>RTA</i>)</p> <p><b>Nutritional status</b></p> <p><input type="checkbox"/> Obese</p> <p><input type="checkbox"/> Cachetic</p> <p><input type="checkbox"/> Other (specify) _____</p> |
|--------------------------------------------------------------------------------------------------------------------------------------------------------------------------------------------------------------------------------------------------------------------------------------------------------------------------------------------------------------------------------------------------------------------------------------------------------------------------------------------------------------------------------------------------------------------------------------------------------------------------------------------------------------------------------------------------------------------------------------------------------------------------------------------------------------------------------------------------------------------------------------------------------------------------------------------------------------------------------------------------------------------------------------------------------------------------------------------------------------------------------------------------------------------------------------------------------------------------------------------------------------------------------------------------------------------------------------------------------------------------------------------------------------------------------------------------------------------------------------------------------------------------------------------------------------|--------------------------------------------------------------------------------------------------------------------------------------------------------------------------------------------------------------------------------------------------------------------------------------------------------------------------------------------------------------------------------------------------------------------------------------------------------------------------------------------------------------------------------------------------------------------------------------------------------------------------------------------------------------------------------------------------------------------------------------------------------------------------------------------------------------------------------------------------------------------------------------------------------------------------------------------------------------------------------------------------------------------------------------------------------------------------------------------------------------------------------------------------------------------------------------------------------------------------------------------------------------------------------------------------------------------------------------------------------------------------------------------------------------|

**Other co-morbidity**

Specify \_\_\_\_\_

**Allergies**

Specify \_\_\_\_\_

## A5 SPECIALTY CARING FOR PATIENT

Indicate with a tick (✓) under which specialty the patient was admitted.

Indicate with a cross (✗) which specialty was responsible for the patient when the AE occurred.

**GENERAL**  0 uncertain  1 Accident & Emergency (A&E)  2 General Intensive Care

**SURGERY**

|                                                 |                                                 |                                                   |
|-------------------------------------------------|-------------------------------------------------|---------------------------------------------------|
| <input type="checkbox"/> 3 Anaesthesiology      | <input type="checkbox"/> 9 Obstetrics           | <input type="checkbox"/> 15 Urological Surgery    |
| <input type="checkbox"/> 4 Cardiac Surgery      | <input type="checkbox"/> 10 Orthopaedic Surgery | <input type="checkbox"/> 16 ENT Surgery           |
| <input type="checkbox"/> 5 Colon/Rectal Surgery | <input type="checkbox"/> 11 Paediatric Surgery  | <input type="checkbox"/> 17 Eye Surgery           |
| <input type="checkbox"/> 6 General Surgery      | <input type="checkbox"/> 12 Plastic Surgery     | <input type="checkbox"/> 18 Other (specify) _____ |
| <input type="checkbox"/> 7 Gynaecology          | <input type="checkbox"/> 13 Thoracic Surgery    | _____                                             |
| <input type="checkbox"/> 8 Neurosurgery         | <input type="checkbox"/> 14 Vascular Surgery    | _____                                             |

**MEDICINE**

|                                                              |                                                                             |                                                   |
|--------------------------------------------------------------|-----------------------------------------------------------------------------|---------------------------------------------------|
| <input type="checkbox"/> 19 Cardiology (incl. CCU)           | <input type="checkbox"/> 28 Internal Medicine<br>(not otherwise classified) | <input type="checkbox"/> 36 Physical Medicine     |
| <input type="checkbox"/> 20 Dermatology                      | <input type="checkbox"/> 29 Medical Oncology                                | <input type="checkbox"/> 37 Psychiatry            |
| <input type="checkbox"/> 21 Endocrinology                    | <input type="checkbox"/> 30 Medical Ophthalmology                           | <input type="checkbox"/> 38 Pulmonary Disease     |
| <input type="checkbox"/> 22 Family Practice                  | <input type="checkbox"/> 31 Neonatology                                     | <input type="checkbox"/> 39 Radiation Therapy     |
| <input type="checkbox"/> 23 Gastroenterology                 | <input type="checkbox"/> 32 Nephrology                                      | <input type="checkbox"/> 40 Radiology             |
| <input type="checkbox"/> 24 Geriatrics (care of the elderly) | <input type="checkbox"/> 33 Neurology                                       | <input type="checkbox"/> 41 Rehabilitation Unit   |
| <input type="checkbox"/> 25 Haematology                      | <input type="checkbox"/> 34 Pathology                                       | <input type="checkbox"/> 42 Rheumatology          |
| <input type="checkbox"/> 26 Immunology and Allergy           | <input type="checkbox"/> 35 Paediatrics                                     | <input type="checkbox"/> 43 Other (specify) _____ |
| <input type="checkbox"/> 27 Infectious Disease               |                                                                             | _____                                             |

**OTHER**

|                                                     |                                                                 |                                                                       |
|-----------------------------------------------------|-----------------------------------------------------------------|-----------------------------------------------------------------------|
| <input type="checkbox"/> 44 Dentistry/Oral Surgery  | <input type="checkbox"/> 48 Nursing                             | <input type="checkbox"/> 52 Podiatry                                  |
| <input type="checkbox"/> 45 Dietary                 | <input type="checkbox"/> 49 Osteopathy                          | <input type="checkbox"/> 53 Support Services<br>(e.g. transportation) |
| <input type="checkbox"/> 46 Hospital Physical Plant | <input type="checkbox"/> 50 Pharmacy                            | <input type="checkbox"/> 54 Other (specify) _____                     |
| <input type="checkbox"/> 47 Midwifery               | <input type="checkbox"/> 51 Physical or<br>Occupational Therapy | _____                                                                 |

## A6 IDENTIFYING MAIN FEATURES OF THE ADVERSE EVENT

An adverse event has to fulfil all **three** criteria:

- an **unintended injury or complication**,
- temporary or permanent disability and/or increased length of stay or death**
- caused by health care management**

a) INJURY or COMPLICATION Was there a patient injury or complication?  Yes  No

b) DISABILITY / EXTENDED STAY Did the injury or complication result in disability at the time of discharge and/or a prolonged hospital stay (or re-admission or out-patient treatment) or death?

- |                                          |                              |                             |
|------------------------------------------|------------------------------|-----------------------------|
| 1 Disability at discharge                | <input type="checkbox"/> Yes | <input type="checkbox"/> No |
| 2 Prolonged/subsequent stay or treatment | <input type="checkbox"/> Yes | <input type="checkbox"/> No |
| 3 Death                                  | <input type="checkbox"/> Yes | <input type="checkbox"/> No |

c) CAUSE OF INJURY OR COMPLICATION

This question relates to circumstances that led to the injury such as a procedure or treatment that caused the injury or whether there was some omission in management or ordinary standard of care. One way to help understand this question is to consider whether the injury or complication would have occurred if the procedure had not been carried out. For example where a patient suffered a wound infection following surgery there is strong evidence that healthcare management is responsible (the wound infection would not have occurred without the surgery). Where the patient may have been predisposed to wound infections then the confidence score for will be reduced.

Was the patient's injury/complication caused by

- |                                                                                    |
|------------------------------------------------------------------------------------|
| <input type="checkbox"/> 1 health care management                                  |
| <input type="checkbox"/> 2 health care management interacting with disease process |
| <input type="checkbox"/> 3 solely by disease process                               |

**A6 (cont.)**

After consideration of the clinical details of the patient's management, *irrespective of preventability*, what **level of confidence do you have that the HEALTH CARE MANAGEMENT caused the injury?**

- 1 Virtually no evidence for management causation/system failure.  
Injury entirely due to patient's pathology (no AE: then STOP)
- 2 Slight to modest evidence for management causation
- 3 Management causation not likely; less than 50-50 but close call
- 4 Management causation more likely than not, more than 50-50 but close call
- 5 Moderate/strong evidence for management causation
- 6 Virtually certain evidence for management causation

**If more than one AE is identified, please see instructions in the manual**

**A7 ADVERSE EVENT SUMMARY**

Date of adverse event        
d d m m y y

**Describe AE in context of overall illness**

Give details of the pre-admission assessment / waiting period relevant to AE \_\_\_\_\_

\_\_\_\_\_  
\_\_\_\_\_

Give details of contributory events leading up to the AE \_\_\_\_\_

\_\_\_\_\_  
\_\_\_\_\_

Give details of any key action/inaction that played a significant part in the causation of the AE \_\_\_\_\_

\_\_\_\_\_  
\_\_\_\_\_

Give details of the injury or complication caused by the AE \_\_\_\_\_

\_\_\_\_\_  
\_\_\_\_\_

Give any other details relevant to the AE (e.g. time of event if known) \_\_\_\_\_

\_\_\_\_\_  
\_\_\_\_\_

**With this clinical scenario indicate, if possible, how often this sort of injury or complication may occur?**

- 1 very rarely (<1%)       3 occasionally (10-24%)
- 2 rarely (1-9%)       4 frequently (> 25%)

**Describe the principal problem in the patient's care that led to the AE (e.g. was it a diagnostic error, technical mishap, failure to monitor, etc.)** \_\_\_\_\_

---

---

---

**A7 (cont.)**

Identify any other problems (major lapses in care) related to this AE and when these occurred in relation to the principal problem

- 1. \_\_\_\_\_
- 2. \_\_\_\_\_
- 3. \_\_\_\_\_

Specify the period(s) during which the principal problem in care occurred. Tick as many as apply to the principal problem. **This will identify which sub-section in Stage C you will need to complete.**

- C1.** Care on admission to a ward (includes pre-operative assessment and assessment in A&E department and emergency care before full assessment)
- C2.** Care during a procedure (including surgery and anaesthesia)
- C3.** Post-operative care or post-procedure/High dependency or ITU care
- C4.** General ward care (after operation; or after full assessment and commencement of medical care)
- C5.** End of admission assessment and discharge care

Was there an error in handling the AE?

- Yes     No     Not clear

If so, give details \_\_\_\_\_

\_\_\_\_\_

**A8 ADEQUACY OF RECORDS FOR JUDGEMENT OF AE**

How adequate were the records in providing information to enable judgements of AE?

- 1 Medical records were adequate to make a reasonable judgement
- 2 Some deficiencies in the records (specify) \_\_\_\_\_
- 3 Major deficiencies (specify) \_\_\_\_\_
- 4 Severe deficiencies, impossible to make judgements about AE (specify) \_\_\_\_\_

## Stage B: THE INJURY AND ITS EFFECTS

### B1 DISABILITY CAUSED BY ADVERSE EVENT

**Describe the impact of the adverse event on the patient** (e.g. increased pain and suffering for x days; delayed recovery from primary illness; patient not given adequate care and support; contributed to or caused death)

---

---

---

**Please use your judgement to assess the degree of disability** (tick the relevant number)

#### **Physical impairment**

- 0 No physical impairment or disability (still an AE if hospital stay was prolonged)
- 1 Minimal impairment and/or recovery in one month
- 2 Moderate impairment, recovery in one to six months
- 3 Moderate impairment, recovery in six months to a year
- 4 Permanent impairment, disability 1-50%
- 5 Permanent impairment, disability > 50%
- 6 Permanent nursing
- 7 Institutional care
- 8 Death (specify what was the contribution of AE to the death)
  - 8.1 Death unrelated to AE
  - 8.2 Minimal contribution from AE
  - 8.3 Moderate contribution from AE
  - 8.4 Death entirely due to AE
- 9 Cannot reasonably judge

#### **Emotional trauma**

- 0 No emotional trauma
- 1 Minimal emotional trauma and/or recovery in one month
- 2 Moderate trauma, recovery in one to six months
- 3 Moderate trauma, recovery in six months to a year
- 4 Severe trauma effects lasting longer than a year
- 5 Cannot reasonably judge

### B2 THE EFFECT OF THE ADVERSE EVENT ON HOSPITAL RESOURCES

**Was a portion of, or the entire hospitalisation, due to the AE (including transfer to another hospital where known)**

- 1 No increase in hospital days
- 2 Portion of hospital stay
- 3 Re-admission (entire subsequent hospital stay)

**Estimate how many additional days, or partial days, were spent in hospital because of the AE?** \_\_\_\_\_ days (\*)

**Estimate the total number of days attributable to the AE.**

Indicate which specialty and number of days, or partial days, per specialty attributable to the AE.

Medical specialty (specify) \_\_\_\_\_ No. of extra bed days per specialty \_\_\_\_\_  
Surgical specialty (specify) \_\_\_\_\_  
ICU/CCU/HDU\* (specify) \_\_\_\_\_  
Other (specify) \_\_\_\_\_

\* Intensive Care Unit / Coronary Care Unit /

**Total number of extra days attributable to the AE** \_\_\_\_\_



**B3 ADDITIONAL TREATMENT AS A RESULT OF THE AE**

**What additional *procedures* (medical or surgical procedures, including any unnecessary investigations) were performed as a result of the AE?**

---

---

**What additional *medications* (including intravenous fluids and blood transfusion) were administered as a result of the AE?**

---

---

**What additional *treatment* (e.g. physiotherapy, counselling) was given as a result of the AE?**

---

---

---

---

**Stage C: PERIOD OF HOSPITALISATION DURING WHICH ADVERSE EVENT OCCURRED**

**Complete: Section(s) relevant to the adverse event (see A7) AND Section C6**

**C1 ADVERSE EVENT RELATED TO CARE ON ADMISSION WARD (Including PRE-OP ASSESSMENT)**

**When did the principal problem occur?**

- 1. in A&E (accident & emergency department) before admission to the ward
- 2. during the initial ward assessment (up to first working diagnosis and initial treatment)
- 3. during the pre-operative assessment

**Who was responsible for the initial care?**

**in A&E**

- 1. Casualty officer unsupervised
- 2. Casualty officer supervised
- 3. A&E registrar
- 4. A&E consultant
- 5. Other (specify) \_\_\_\_\_

**On the ward**

- 1. Ward doctor (house officer) apparently unsupervised
- 2. Ward doctor supervised
- 3. SHO (senior house officer)
- 4. Registrar
- 5. Consultant
- 6. Other (Specify, e.g. anaesthetist for pre-op assessment) \_\_\_\_\_

**For patients requiring surgery, who was responsible for the pre-op assessment?**

- 1. As for initial assessment on the ward
- 2. Anaesthetist
- 3. Assistant anaesthetist
- 4. Other (specify) \_\_\_\_\_

**What was the nature of the principal problem in this phase of care (indicate as many as apply)**

**In A & E or On Ward**

- 1 Failure to diagnose primary condition correctly → D1
- 2 Overall assessment → D2  
(e.g. Failure to perform a satisfactory assessment of patient's overall condition including appropriate tests; No evidence of focussed assessment such as of cardio-respiratory system)
- 3 Management/monitoring incl. Nursing/Ancillary care → D3  
(e.g. Failure to act upon results of tests or findings; Failure to set up adequate monitoring; Failure to provide prophylactic care (e.g. physiotherapy); Failure to provide high-dependency/ ITU care)
- 4 Infection-related → D4
- 5 Technical problem related to a procedure → D5  
(including inappropriate/unnecessary procedures, e.g. urinary catheterisation)
- 6 Failure to give correct medication/maintain correct hydration / electrolytes / blood (including failure to provide prophylactic medication e.g. anti-coagulants/antibiotics) → D6
- 7 Resuscitation → D7
- 8 Other (e.g. falls; specify) \_\_\_\_\_

**Were there any other problems during this period/section of care not covered by the above?**

Yes  No

If so, specify \_\_\_\_\_

\_\_\_\_\_  
\_\_\_\_\_



**C2 PROCEDURE RELATED PRINCIPAL PROBLEM** (including surgical operations, anaesthesia, manipulation of fractures, invasive medical/endoscopic/radiological procedures)

**To which procedure was the AE related?**

- |                                                                                                              |                                                                          |
|--------------------------------------------------------------------------------------------------------------|--------------------------------------------------------------------------|
| <input type="checkbox"/> 1 Administration of anaesthetic<br>(specify type; e.g. inhalation, local, epidural) | <input type="checkbox"/> 9 Gaining IV access                             |
| <input type="checkbox"/> 2 Surgical operation                                                                | <input type="checkbox"/> 10 Setting up CVP line                          |
| <input type="checkbox"/> 3 Manipulation of fracture                                                          | <input type="checkbox"/> 11 Catheterising bladder                        |
| <input type="checkbox"/> 4 Endoscopic procedure                                                              | <input type="checkbox"/> 12 Draining fluid from body cavity              |
| <input type="checkbox"/> 5 Needle biopsy                                                                     | <input type="checkbox"/> 13 Thoracic drain for pneumothorax              |
| <input type="checkbox"/> 6 Vascular catheterisation                                                          | <input type="checkbox"/> 14 Lumbar puncture                              |
| <input type="checkbox"/> 7 Interventional radiology                                                          | <input type="checkbox"/> 15 Administering drugs other than orally        |
| <input type="checkbox"/> 8 Other specialist procedure (specify) _____                                        | <input type="checkbox"/> 16 Siting a naso-gastric (or naso-enteric) tube |
|                                                                                                              | <input type="checkbox"/> 17 Other ward-based procedure (specify) _____   |

**When was the procedure (or the administration of anaesthesia) carried out?**

Date \_\_\_\_\_ Time of start \_\_\_\_\_

Time of finish \_\_\_\_\_

**Specify patient's medical condition that required the procedure if different from the primary diagnosis indicated in A3** \_\_\_\_\_

**Was the procedure**

- |                                           |                                      |
|-------------------------------------------|--------------------------------------|
| <input type="checkbox"/> 1 Emergency      | <input type="checkbox"/> 3 Elective  |
| <input type="checkbox"/> 2 Semi-emergency | <input type="checkbox"/> 4 Not clear |

**Who undertook the procedure or anaesthesia?**

- |                                                                                           |
|-------------------------------------------------------------------------------------------|
| <input type="checkbox"/> 1. Consultant or fully trained operator <i>with</i> assistant    |
| <input type="checkbox"/> 2. Consultant or fully trained operator <i>without</i> assistant |
| <input type="checkbox"/> 3. Supervised trainee                                            |
| <input type="checkbox"/> 4. Unsupervised trainee                                          |
| <input type="checkbox"/> 5. Other (specify) _____                                         |
| <input type="checkbox"/> 6. Not clear                                                     |

**What was the nature of the principal problem underlying the AE**

- |                                                                                                                                          |      |
|------------------------------------------------------------------------------------------------------------------------------------------|------|
| <input type="checkbox"/> 1 Diagnosis                                                                                                     | → D1 |
| <input type="checkbox"/> 2 Overall assessment (incl. Pre-op assessment)                                                                  | → D2 |
| <input type="checkbox"/> 3 Management/monitoring (incl. Nursing/Ancillary care)                                                          | → D3 |
| <input type="checkbox"/> 4 Infection-related related to a procedure                                                                      | → D4 |
| <input type="checkbox"/> 5 Technical problem related to a procedure<br>(e.g. Intubation; Equipment failure; Monitoring during procedure) | → D5 |
| <input type="checkbox"/> 6 Drugs/ Fluids (incl. anaesthetic agent) / Blood                                                               | → D6 |
| <input type="checkbox"/> 7 Resuscitation                                                                                                 | → D7 |
| <input type="checkbox"/> 8 Other (specify) _____                                                                                         |      |

**Were there any other problems during this period/section of care not covered by the above?**

Yes  No

If so, specify \_\_\_\_\_

\_\_\_\_\_  
\_\_\_\_\_

**C3 PRINCIPAL PROBLEM DURING IMMEDIATE POST-PROCEDURAL CARE, HIGH DEPENDENCY CARE or ITU CARE**

**When did the principal problem occur?**

- 1. during the immediate post-procedural care (i.e. whilst in the recovery area)
- 2. during high dependency care
- 3. during care in the intensive care unit

**Who was responsible for post-procedural, HDU or ITU care?**

- 1 Doctor who carried out procedure
- 2 HDU or ITU Team
- 3 Assistant (specify) \_\_\_\_\_
- 4 Specific doctor (specify) \_\_\_\_\_
- 5 Anaesthetist
- 6 Ward doctor
- 7 Other (specify) \_\_\_\_\_
- 8 Not clear

**What is the nature of the principal problem?**

- 1 Diagnosis → D1
- 2 Overall assessment → D2
- 3 Management/monitoring (incl. Nursing/Ancillary care) → D3  
(e.g. Failure to monitor adequately; Failure to treat appropriately;  
Failure to ensure condition stable before handover)
- 4 Infection-related → D4
- 5 Technical problem related to a procedure → D5
- 6 Drugs (including anaesthetic agent) / Fluids / Blood → D6
- 7 Resuscitation → D7
- 8 Other (specify) \_\_\_\_\_

**Were there any other problems during this period/section of care not covered by the above?**

Yes  No

If so, specify \_\_\_\_\_

\_\_\_\_\_  
\_\_\_\_\_

**C4 PRINCIPAL PROBLEM RELATED TO WARD CARE (Including errors in clinical management)**

If the principal problem was in ward care, was it due to (Tick all that apply)

- 1 a failure in medical care (i.e. care by ward doctors)
- 2 a failure in nursing care
- 3 a failure in care from professions allied to medicine:
  - 3.1 Physiotherapy
  - 3.2 Dietician/nutritionist
  - 3.3 Pharmacist
  - 3.4 Chiropody
  - 3.5 Social worker
  - 3.6 Other (specify) \_\_\_\_\_

Describe the principal problem: \_\_\_\_\_  
\_\_\_\_\_  
\_\_\_\_\_

Who was responsible for the episode of ward care related to the principal problem?

- 1 Ward doctor (house officer or SHO status) who 'knew' the patient
- 2 Ward doctor *unlikely* to 'know' patient
- 3 Ward doctors under guidance of specialist registrar
- 4 Trained specialists (specialist registrar/consultant)
- 5 Senior nurse
- 6 Junior nurse
- 7 Agency nurse
- 8 Other allied professional (specify) \_\_\_\_\_
- 9 Other (specify) \_\_\_\_\_
- 10 Cannot determine from record

What was the nature of the principal problem? (tick the appropriate number(s))

- 1 Diagnosis → D1
- 2 Overall assessment → D2
- 3 Medical management/monitoring (incl. Nursing/Ancillary care) → D3
- 4 Infection-related → D4
- 5 Technical problem related to a procedure → D5
- 6 Drugs/ Fluids / Blood → D6
- 7 Resuscitation after collapse → D7
- 8 Other (specify) \_\_\_\_\_

Were there any other problems during this period/section of care not covered by the above?

Yes  No

If so, specify \_\_\_\_\_  
\_\_\_\_\_  
\_\_\_\_\_

**C5 FAILURE TO ASSESS ADEQUATELY AT THE TIME OF DISCHARGE**

**Which doctor was directly responsible for assessing the patient before discharge?**

- 1. House-officer
- 2. Registrar
- 3. Consultant
- 4. Other (specify) \_\_\_\_\_

**What is the nature of the principal problem?**

- 1 Diagnosis → D1
- 2 Overall assessment → D2
- 3 Medical Management/monitoring/ Nursing care → D3  
(e.g. Clinical condition not under good control; Patient not well enough to be discharged, e.g. mobilised; Failure to teach patient about their condition; Failure to communicate adequately with services in community care, including GP)
- 4 Infection-related → D4
- 5 Technical problem related to a procedure → D5
- 6 Drug problem/ Fluids e.g. Medications not appropriate) / Blood → D6
- 7 Resuscitation → D7
- 8 Other (specify) \_\_\_\_\_

**Were there any other problems during this period/section of care not covered by the above?**

Yes  No

If so, specify \_\_\_\_\_

**C6 NATURE OF THE PRINCIPAL PROBLEM**

**From your responses to all sections completed above indicate which section(s) in D are to be completed**

- D1
- D2
- D3
- D4
- D5
- D6
- D7

**Stage D: PRINCIPAL PROBLEMS IN THE PROCESS OF CARE**

**Go to the relevant sections in Stage D as identified in Stage C (C6)**

**D1 ADVERSE EVENT RELATED TO DIAGNOSTIC OR ASSESSMENT ERROR**

**Was the adverse event the result of diagnostic error?**  Yes  No

If yes, give details \_\_\_\_\_  
\_\_\_\_\_

**Was the adverse event the result of a delay in diagnosis?**  Yes  No

If yes, what was the length of delay? \_\_\_\_\_  
\_\_\_\_\_

**Was the person responsible for the diagnostic assessment (at which there was unacceptable error or delay) of appropriate seniority or experience?**  Yes  No

If no, explain \_\_\_\_\_  
\_\_\_\_\_

**Factors contributing to the diagnostic error** (tick as many as apply).

- 1 Failure to take an adequate history and/or to perform a satisfactory physical examination.
- 2 Failure **or delay** to employ indicated test.
- 3 Test was incorrectly performed
- 4 Test was incorrectly reported
- 5 Failure **or delay** to receive report
- 6 Failure **or delay** to act upon results of tests or findings.
- 7 Failure to draw sensible/reasonable conclusions or make a differential diagnosis
- 8 Failure **or delay** to get expert opinion from:
  - 8.1 more senior member of team
  - 8.2 specialist clinical team
  - 8.3 non-clinical specialist (e.g. radiologist) (specify) \_\_\_\_\_
- 9 Expert opinion incorrect
- 10 Other (specify) \_\_\_\_\_

**Did other factors contribute to AE?**

- 1 Led to inappropriate or inadequate treatment
- 2 Risk:benefit ratio of treatment was not assessed/appreciated
- 3 Patient's degree of vulnerability was not recognised
- 4 Other (specify) \_\_\_\_\_

**Were there any other problems related to diagnostic assessment?**  Yes  No

If yes, give details \_\_\_\_\_  
\_\_\_\_\_



**D2 ADVERSE EVENT FROM FAILURE TO APPRECIATE PATIENT'S OVERALL CONDITION**

**Was the person responsible for the care of this patient of appropriate seniority or experience?**

Yes  No

If no, explain (e.g. lack of appropriate supervision) \_\_\_\_\_

\_\_\_\_\_

**In what respect was overall assessment inadequate?**

- 1 Failure to take a full clinical history
- 2 Failure to examine carefully
- 3 Failure to take account of co-morbidity
- 4 Failure to monitor adequately
- 5 Failure to record
- 6 Failure to communicate to the rest of the team (clinical and multi-disciplinary)
- 7 Other (specify) \_\_\_\_\_

**How did this contribute to AE?**

- 1 Patient's degree of vulnerability was not recognised
- 2 Risk:benefit ratio of treatment was not assessed/appreciated
- 3 Led to inappropriate or inadequate treatment
- 4 Other (specify) \_\_\_\_\_

**Were there any other problems related to assessment or management of the patient's overall condition?**

Yes  No

If yes, give details \_\_\_\_\_

\_\_\_\_\_

\_\_\_\_\_

**D3 AE ARISING FROM A FAILURE IN CLINICAL MONITORING / MANAGEMENT**  
(incl. DISCHARGE ARRANGEMENTS, NURSING/ANCILLARY SERVICES)

Indicate if the patient was:

- 1 Post operative (including post-delivery, postmanipulation of fracture)
- 2 Undergoing medical (non-surgical) treatment
- 3 Undergoing rehabilitation
- 4 Other (specify) \_\_\_\_\_

Was the adverse event the result of problems in the monitoring / observation of this patient?

Yes  No

If yes, give details \_\_\_\_\_

Was the adverse event the result of failure in overall management (acting on observations) of the patient?

Yes  No

If yes, what was the problem in management? \_\_\_\_\_

Was the AE the result of failure to ensure condition stable before handover to other areas?

Yes  No

If yes, give details \_\_\_\_\_

Was the person responsible for the care of this patient of appropriate seniority or experience?

Yes  No

If no, explain \_\_\_\_\_

Was the inadequate monitoring/management related to failure to recognise:

- 1 Abnormal vital signs (including neurological status)
- 2 Problems with fluids/electrolytes including renal function
- 3 Side-effects of medication
- 4 Cardio-pulmonary dysfunction
- 5 Damage to skin and pressure areas
- 6 Adequate mobilisation
- 7 Infection
- 8 Poor progress in healing (e.g. checking gut function after abdominal operation; care of wounds/canular sites)
- 9 Changes to the patient's general condition (e.g. patient develops a medical condition, e.g. CHF)
- 10 Other (specify) \_\_\_\_\_

Continue overleaf

**D3. (Cont.)**

**In what respects was clinical management unsatisfactory?**

- 1 Failure to take note of 'routine' observations e.g. TPR charts, neurological assessment, fluid balance (check if charts completed)
- 2 Delay in noting lab/test results
- 3 Not aware of significance of lab/test results
- 4 Failure to act appropriately on lab/test results
- 5 Poor note-keeping
- 6 Inadequate handover
- 7 Lack of liaison with other staff
- 8 Inadequate 'out-of-hours' cover/working practice
- 9 Guideline/ protocol failure (either not available or not followed)  
(specify) \_\_\_\_\_
- 10 Apparent failure to recognise deterioration
- 11 Deterioration recognised but additional care not provided (specify, e.g. was high dependency care indicated) \_\_\_\_\_
- 12 Failure to recruit help
  - 12.1 Medical
  - 12.2 Nursing
  - 12.3 Ancillary (specify) \_\_\_\_\_
- 13 Other (specify) \_\_\_\_\_

**Was there a failure in discharge procedure?**

Yes  No

If yes, indicate which of the following apply to this patient regarding and give details

- 1 Failure to educate the patient including use of protocols (e.g. for asthma, diabetes, post MI)  
\_\_\_\_\_
- 2 Failure to show evidence that discharge status was appropriate to home conditions (e.g. careplan)  
\_\_\_\_\_
- 3 Failure to liaise adequately with community carers (e.g. GP, district nurse, social worker)  
\_\_\_\_\_
- 4 Other (specify) \_\_\_\_\_  
\_\_\_\_\_

**What other factors interacted with failure in monitoring/management, handover or discharge to cause to the AE?**

- 1 Condition not treated or not treated adequately
- 2 Patient's degree of vulnerability was not recognised
- 3 Risk:benefit ratio of treatment was not assessed/appreciated
- 4 Other (specify) \_\_\_\_\_

**Were there any other problems related to monitoring/management including handover and discharge?**

Yes  No

If yes, give details \_\_\_\_\_  
\_\_\_\_\_

**D4 ADVERSE EVENT IN RELATION TO FAILURE TO PREVENT/CONTROL/MANAGE INFECTION**

**What was the site of infection/infection related to?**

- 1 Surgical wound
- 2 Internal invasive procedure
- 3 Urinary tract
- 4 Respiratory tract
- 5 Blood
- 6 Other (specify) \_\_\_\_\_

**What was the nature of the infection?**

- 1. Contaminated wound
- 2. Side-effect of drugs (specify type):
  - a. Antibiotic-induced C. difficile
  - b. yeast infection
  - c. Immuno-suppressive drugs
  - d. Other (specify) \_\_\_\_\_
- 3. Cross-infection (specify type):
  - a. MRSA (describe) \_\_\_\_\_
  - b. Salmonella
  - c. Other (specify) \_\_\_\_\_
- 4. Foreign body (specify type):
  - a. Urinary catheter
  - b. Venflon or intravenous catheter
  - c. Swab
  - d. Drainage tube
  - e. Shunt
  - f. Other (specify) \_\_\_\_\_
- 5. Stasis (specify type):
  - a. Respiratory depression
  - b. Urinary retention
  - c. Other (specify) \_\_\_\_\_
- 6. Other type of infection (specify) \_\_\_\_\_

**Was the person responsible for the prevention/control/management of infection of appropriate seniority or experience?**

Yes  No

If no, explain \_\_\_\_\_  
\_\_\_\_\_

**What were the errors in managing the AE due to infection? Give details.**

- 1 Failure to drain pus or remove necrotic material \_\_\_\_\_
- 2 Failure to give appropriate antibiotics (including overuse) \_\_\_\_\_
- 3 Failure to give appropriate physiotherapy (e.g. chest) \_\_\_\_\_
- 4 Failure to maintain care of catheters/canulas/drains/wounds \_\_\_\_\_
- 5 Other (specify) \_\_\_\_\_

**How did this contribute to AE?**

- 1 Failure to minimise risk in a vulnerable patient
- 2 Risk:benefit ratio of treatment was not assessed/appreciated
- 3 Led to inappropriate treatment
- 4 Other (specify) \_\_\_\_\_

Continued overleaf

**D4. (Cont.)**

**Were there any other problems related to the management of infection?**

**Yes**    **No**

If yes, give details \_\_\_\_\_

\_\_\_\_\_

\_\_\_\_\_

**D5 ADVERSE EVENTS DIRECTLY RELATED TO A PROBLEM WITH AN OPERATION OR PROCEDURE**

**Was the procedure**

- 1 ward-based
- 2 in operating theatre suite
- 3 elsewhere (e.g. radiology; specify) \_\_\_\_\_

**Do you consider the procedure was performed by a person of appropriate seniority?**

Yes  No

If no, give reasons \_\_\_\_\_  
\_\_\_\_\_

**Choose one of the following that best describes the nature of the adverse event** (give details where possible)

1 Avoidable delay in undertaking procedure \_\_\_\_\_

2 Inappropriate procedure – specify alternative \_\_\_\_\_  
\_\_\_\_\_

3 Inadequate assessment/treatment/preparation before procedure (specify) \_\_\_\_\_  
\_\_\_\_\_

**4 Anaesthetic incident**

4.1 Intubation (specify) \_\_\_\_\_

4.2 Anaesthetic agent \_\_\_\_\_

4.3 Equipment failure \_\_\_\_\_

4.4 Monitoring during procedure (e.g. oxygenation, CO<sub>2</sub>, airway pressure) \_\_\_\_\_

4.5 Other (specify) \_\_\_\_\_

**5 Operation/procedure accident**

5.1 Difficulty in defining anatomy (specify) \_\_\_\_\_

5.2 Inadvertent organ damage (specify) \_\_\_\_\_

5.3 Bleeding (specify, e.g. from slipped ligature; from vascular puncture) \_\_\_\_\_  
\_\_\_\_\_

5.4 Perforation. (specify nature) \_\_\_\_\_

5.5 Anastomotic breakdown (specify contributory factors) \_\_\_\_\_  
\_\_\_\_\_

5.6 Wound problem (e.g. dehiscence). (specify) \_\_\_\_\_

5.7 Siting prosthesis \_\_\_\_\_

5.8 Equipment failure (e.g. inappropriate use, misuse, failed; specify) \_\_\_\_\_  
\_\_\_\_\_

5.9 Other (specify) \_\_\_\_\_

6 Inadequate monitoring during procedure (specify) \_\_\_\_\_  
\_\_\_\_\_

**7 Infection-related**

7.1 Wound (including trip-related cellulitis) \_\_\_\_\_

7.2 Internal infection (e.g. abscess, specify) \_\_\_\_\_

7.3 Other (e.g. cholangitis, specify) \_\_\_\_\_

8 Other, including inefficacious result (specify) \_\_\_\_\_  
\_\_\_\_\_

Continue overleaf

**D5. (Cont.)**

**Did other factors contribute to the procedure-related AE?**

Yes  No

If yes, specify

- 1 Patient's degree of vulnerability was not recognised
- 2 Risk:benefit ratio of treatment was not assessed/appreciated
- 3 Led to inappropriate or inadequate treatment
- 4 Other (specify) \_\_\_\_\_

**Were there any other problems related to the management of a procedure?**

Yes  No

If yes, give details \_\_\_\_\_

\_\_\_\_\_

**How long was any *extended* operation time as a result of the AE?** \_\_\_\_\_ minutes

**How long was any *additional* operation time as a result of the AE?** \_\_\_\_\_ minutes

**D6 ADVERSE EVENT RELATED TO PRESCRIBING, ADMINISTRATION OR MONITORING OF DRUGS OR FLUIDS (including BLOOD)**

**How was the drug / fluid administered?**

- |                                           |                                        |                                                  |
|-------------------------------------------|----------------------------------------|--------------------------------------------------|
| <input type="checkbox"/> 1 Intravenous    | <input type="checkbox"/> 4 orally      | <input type="checkbox"/> 7 topical               |
| <input type="checkbox"/> 2 Intra-muscular | <input type="checkbox"/> 5 sublingual  | <input type="checkbox"/> 8 rectal                |
| <input type="checkbox"/> 3 Subcutaneous   | <input type="checkbox"/> 6 intrathecal | <input type="checkbox"/> 9 Other (specify) _____ |

Was there an error in the prescription/preparation of drugs/iv fluids/blood?  Yes  No

If so, specify \_\_\_\_\_  
\_\_\_\_\_

Was there an error or accident in administering drugs/iv fluids/blood?

(e.g. too high dose, incorrect site, haematoma)  Yes  No

If so, specify \_\_\_\_\_  
\_\_\_\_\_

Was there a failure to monitor drug action/toxicity/fluid balance?  Yes  No

If so, specify \_\_\_\_\_  
\_\_\_\_\_

**What was the drug?**

- |                                           |                                                    |                                                                |
|-------------------------------------------|----------------------------------------------------|----------------------------------------------------------------|
| <input type="checkbox"/> 1 antibiotic     | <input type="checkbox"/> 7 sedative or hypnotic    | <input type="checkbox"/> 13 potassium                          |
| <input type="checkbox"/> 2 antineoplastic | <input type="checkbox"/> 8 peptic ulcer medication | <input type="checkbox"/> 14 NSAID                              |
| <input type="checkbox"/> 3 anti-seizure   | <input type="checkbox"/> 9 antihypertension        | <input type="checkbox"/> 15 Narcotic (e.g. morphine/pethidine) |
| <input type="checkbox"/> 4 anti-diabetes  | <input type="checkbox"/> 10 antidepressant         | <input type="checkbox"/> 16 Diuretics                          |
| <input type="checkbox"/> 5 cardiovascular | <input type="checkbox"/> 11 antipsychotic          | <input type="checkbox"/> 17 Other (specify) _____              |
| <input type="checkbox"/> 6 antiasthmatic  | <input type="checkbox"/> 12 anticoagulant          | _____                                                          |

Name of drug: \_\_\_\_\_

Describe the drug's adverse effect: \_\_\_\_\_  
\_\_\_\_\_

**What was the nature of the drug-related injury?**

- 1 Drug less effective than expected (e.g. as result of delayed treatment; dose too little)
- 2 Side-effect of drug
- 3 Effect of high dose for this patient in this circumstance
- 4 Idiosyncratic (allergic) re-action
- 5 Drug-drug interaction
- 6 Other (specify) \_\_\_\_\_

Was the person responsible for managing the drug regimen for this patient of appropriate seniority or experience?  Yes  No

If no, explain \_\_\_\_\_  
\_\_\_\_\_

Would a doctor using reasonable medical judgement prescribe the drug, even with knowledge beforehand that this adverse effect could occur?  Yes  No

Continue overleaf



**D6. (cont.)**

**What was the cause of the drug-related injury?**

- 1 No underlying cause (other than patient's response)
- 2 Delay in prescribing (specify) \_\_\_\_\_
- 3 Delay in administering (after prescribing) \_\_\_\_\_
- 4 Wrong drug prescribed (specify) \_\_\_\_\_
- 5 Right drug but wrong dose or length of treatment \_\_\_\_\_
- 6 Right drug but wrong route (specify) \_\_\_\_\_
- 7 Error in administration (describe) \_\_\_\_\_
- 8 Inadequate monitoring (describe) \_\_\_\_\_
- 9 Other (specify) \_\_\_\_\_

**Did other factors contribute to the drug-related AE?**

- 1 Patient's degree of vulnerability was not recognised
- 2 Risk:benefit ratio of treatment was not assessed/appreciated
- 3 Led to inappropriate treatment
- 4 Other (specify) \_\_\_\_\_

**Were there any other problems related to the management of fluids or blood?**

Yes  No

If so, specify \_\_\_\_\_

## **D7 ADVERSE EVENT ARISING FROM A RESUSCITATION PROCEDURE**

**What was the condition which led to the need for resuscitation?**

- 1 Cardiac arrest (cause) \_\_\_\_\_
- 2 Respiratory failure/arrest (cause) \_\_\_\_\_
- 3 Coma (specify) \_\_\_\_\_
- 4 Fits
- 5 Bleeding (specify) \_\_\_\_\_
- 6 Multiple trauma
- 7 Metabolic disorder (e.g. hypoglycaemia) (specify) \_\_\_\_\_
- 8 Overwhelming infection (specify) \_\_\_\_\_
- 9 Other (specify) \_\_\_\_\_

**Was the person responsible for the care of this patient during resuscitation of appropriate seniority or experience?**  Yes  No

If no, explain \_\_\_\_\_  
\_\_\_\_\_

**Was there delay in dealing with the problem?**  Yes  No

If yes, what was the reason?

- 1 Staff not available
- 2 Staff not competent
- 3 Equipment not available
- 4 Lack of suitable or needed drugs
- 5 Lack of control (management)
- 6 Other (specify) \_\_\_\_\_

**Was there confusion regarding correct action to take?**

- 1 Inappropriate action
- 2 Failure to obtain appropriate tests/investigations
- 3 Other (specify) \_\_\_\_\_

**How did this contribute to AE?**

- 1 Patient's degree of vulnerability was not recognised
- 2 Risk:benefit ratio of treatment was not assessed/appreciated
- 3 Led to inappropriate treatment
- 4 Other (specify) \_\_\_\_\_

**Were there any other problems related to the management of the patient during resuscitation?**  Yes  No

If yes, give details \_\_\_\_\_  
\_\_\_\_\_  
\_\_\_\_\_

**Stage E: CAUSATIVE / CONTRIBUTORY FACTORS and PREVENTABILITY OF AE**

**E1 CAUSATIVE FACTORS**

*The occurrence of an adverse event, and the actions or omissions of those involved, may be influenced by many contributory factors. Many of these could only be assessed satisfactorily by interviewing the staff involved in the care of the patient. Please indicate, where possible, likely causative factors. Mark unlikely factors with **U**, possible factors with **1, 2 or 3**.*

**Please rate each of the following factors according to its importance, as you see it, in the occurrence of this particular adverse event.**

|                                                                                                                                                                               | <b>Unlikely to be relevant</b> | <b>Possibly relevant</b> | <b>Somewhat important</b> | <b>Very important</b>                                                      |
|-------------------------------------------------------------------------------------------------------------------------------------------------------------------------------|--------------------------------|--------------------------|---------------------------|----------------------------------------------------------------------------|
|                                                                                                                                                                               | <b>U</b>                       | <b>1</b>                 | <b>2</b>                  | <b>3</b>                                                                   |
| <b>1. Patient characteristics</b>                                                                                                                                             |                                |                          |                           | <b>1 2 3</b>                                                               |
|                                                                                                                                                                               | <b>U</b>                       |                          |                           |                                                                            |
| 1.1 Patient was not able to understand/communicate with clinical/nursing team<br>(e.g. deaf, stroke, language difficulties in absence of interpreter or cultural differences) | <input type="checkbox"/>       |                          |                           | <input type="checkbox"/> <input type="checkbox"/> <input type="checkbox"/> |
| 1.2 Personality or social factors                                                                                                                                             | <input type="checkbox"/>       |                          |                           | <input type="checkbox"/> <input type="checkbox"/> <input type="checkbox"/> |
| 1.3 Was co-morbidity an important contributory factor?                                                                                                                        | <input type="checkbox"/>       |                          |                           | <input type="checkbox"/> <input type="checkbox"/> <input type="checkbox"/> |
| 1.4 Other patient characteristics (specify) _____                                                                                                                             | <input type="checkbox"/>       |                          |                           | <input type="checkbox"/> <input type="checkbox"/> <input type="checkbox"/> |
| <b>2. Task factors</b>                                                                                                                                                        |                                |                          |                           | <b>1 2 3</b>                                                               |
|                                                                                                                                                                               | <b>U</b>                       |                          |                           |                                                                            |
| 2.1 New, untested or difficult task or procedure                                                                                                                              | <input type="checkbox"/>       |                          |                           | <input type="checkbox"/> <input type="checkbox"/> <input type="checkbox"/> |
| 2.2 Evidence of lack of guidelines/protocols or their use                                                                                                                     | <input type="checkbox"/>       |                          |                           | <input type="checkbox"/> <input type="checkbox"/> <input type="checkbox"/> |
| 2.3 Test results unavailable, difficult to interpret or inaccurate                                                                                                            | <input type="checkbox"/>       |                          |                           | <input type="checkbox"/> <input type="checkbox"/> <input type="checkbox"/> |
| 2.4 Poor task design/structure                                                                                                                                                | <input type="checkbox"/>       |                          |                           | <input type="checkbox"/> <input type="checkbox"/> <input type="checkbox"/> |
| 2.5 Other task factors (specify) _____                                                                                                                                        | <input type="checkbox"/>       |                          |                           | <input type="checkbox"/> <input type="checkbox"/> <input type="checkbox"/> |
| <b>3. Individual factors</b>                                                                                                                                                  |                                |                          |                           | <b>1 2 3</b>                                                               |
|                                                                                                                                                                               | <b>U</b>                       |                          |                           |                                                                            |
| 3.1 Staff working outside their expertise                                                                                                                                     | <input type="checkbox"/>       |                          |                           | <input type="checkbox"/> <input type="checkbox"/> <input type="checkbox"/> |
| 3.2 Lack of knowledge of individuals                                                                                                                                          | <input type="checkbox"/>       |                          |                           | <input type="checkbox"/> <input type="checkbox"/> <input type="checkbox"/> |
| 3.3 Lack of skill of individuals                                                                                                                                              | <input type="checkbox"/>       |                          |                           | <input type="checkbox"/> <input type="checkbox"/> <input type="checkbox"/> |
| 3.4 Attitude/motivation problem                                                                                                                                               | <input type="checkbox"/>       |                          |                           | <input type="checkbox"/> <input type="checkbox"/> <input type="checkbox"/> |
| 3.5 Long shift/under pressure                                                                                                                                                 | <input type="checkbox"/>       |                          |                           | <input type="checkbox"/> <input type="checkbox"/> <input type="checkbox"/> |
| 3.6 Other individual staff factors (specify) _____                                                                                                                            | <input type="checkbox"/>       |                          |                           | <input type="checkbox"/> <input type="checkbox"/> <input type="checkbox"/> |
| <b>4. Team factors</b>                                                                                                                                                        |                                |                          |                           | <b>1 2 3</b>                                                               |
|                                                                                                                                                                               | <b>U</b>                       |                          |                           |                                                                            |
| 4.1 Poor teamwork                                                                                                                                                             | <input type="checkbox"/>       |                          |                           | <input type="checkbox"/> <input type="checkbox"/> <input type="checkbox"/> |
| 4.2 Inadequate supervision                                                                                                                                                    | <input type="checkbox"/>       |                          |                           | <input type="checkbox"/> <input type="checkbox"/> <input type="checkbox"/> |
| 4.3 Poor verbal communication                                                                                                                                                 | <input type="checkbox"/>       |                          |                           | <input type="checkbox"/> <input type="checkbox"/> <input type="checkbox"/> |
| 4.4 Inadequate handover                                                                                                                                                       | <input type="checkbox"/>       |                          |                           | <input type="checkbox"/> <input type="checkbox"/> <input type="checkbox"/> |
| 4.5 Poor written communication (e.g. defects in notes)                                                                                                                        | <input type="checkbox"/>       |                          |                           | <input type="checkbox"/> <input type="checkbox"/> <input type="checkbox"/> |
| 4.6 Other team factors (specify) _____                                                                                                                                        | <input type="checkbox"/>       |                          |                           | <input type="checkbox"/> <input type="checkbox"/> <input type="checkbox"/> |
| <b>5. Work environment</b>                                                                                                                                                    |                                |                          |                           | <b>1 2 3</b>                                                               |
|                                                                                                                                                                               | <b>U</b>                       |                          |                           |                                                                            |
| 5.1 Defective or unavailable equipment                                                                                                                                        | <input type="checkbox"/>       |                          |                           | <input type="checkbox"/> <input type="checkbox"/> <input type="checkbox"/> |
| 5.2 Problems with provision or scheduling of services (e.g. theatre list, lab tests, x-rays)                                                                                  | <input type="checkbox"/>       |                          |                           | <input type="checkbox"/> <input type="checkbox"/> <input type="checkbox"/> |
| 5.3 Inadequate functioning of hospital support services<br>(e.g. pharmacy, blood bank or housekeeping)                                                                        | <input type="checkbox"/>       |                          |                           | <input type="checkbox"/> <input type="checkbox"/> <input type="checkbox"/> |

- 5.4 Inadequate staffing at the time of the AE
- 5.5 Out of hours (time of day/day of week) factors
- 5.6 Other work environmental factors (specify) \_\_\_\_\_

|  |
|--|
|  |
|  |
|  |

|  |  |  |
|--|--|--|
|  |  |  |
|  |  |  |
|  |  |  |

**6. Organisational/Management factors**

**U**

**1 2 3**

- 6.1 Lack of essential resources (e.g. ITU beds)
- 6.2 Poor co-ordination of overall services
- 6.3 Inadequate senior leadership
- 6.4 Other organisational/management factors (specify) \_\_\_\_\_

|  |
|--|
|  |
|  |
|  |
|  |

|  |  |  |
|--|--|--|
|  |  |  |
|  |  |  |
|  |  |  |
|  |  |  |

**E2 Give details on the 3 MOST IMPORTANT contributory factors to this AE**

1. \_\_\_\_\_

\_\_\_\_\_

\_\_\_\_\_

2. \_\_\_\_\_

\_\_\_\_\_

\_\_\_\_\_

3. \_\_\_\_\_

\_\_\_\_\_

\_\_\_\_\_

**E3 ASSESS THE PREVENTABILITY OF THE ADVERSE EVENT**

In your judgement, is there some evidence that the AE was preventable?  Yes  No

Rate on a 6 point scale the strength of evidence for preventability.

- 1 Virtually no evidence for preventability
- 2 Slight to modest evidence for preventability
- 3 Preventability not quite likely; less than 50-50 but close call
- 4 Preventability more likely than not; more than 50-50 but close call
- 5 Strong evidence for preventability
- 6 Virtually certain evidence for preventability

If you ticked 2 - 6, answer the following questions:

Describe briefly the manner in which the AE could have been prevented. \_\_\_\_\_

\_\_\_\_\_

---

---

**Can you identify any reason(s) for the failure to prevent this AE** \_\_\_\_\_

---

---

---

**A9 EXPERTISE OF REVIEWER**

**Was the reviewer's judgements limited or hampered by lack of subspecialty knowledge?**

**Yes**    **No**

Mark **Yes** if you think a specialist's review is necessary and indicate which specialty or discipline (e.g. pharmacy) listing as many as necessary:

|       |       |       |
|-------|-------|-------|
| _____ | _____ | _____ |
| _____ | _____ | _____ |
| _____ | _____ | _____ |

**Describe the judgement which is limited or hampered by lack of subspecialty knowledge and the clinical question you would pose to a specialist** \_\_\_\_\_

\_\_\_\_\_

\_\_\_\_\_

\_\_\_\_\_

**Describe the resolution of the question(s) posed following consultation with a specialist** \_\_\_\_\_

\_\_\_\_\_

\_\_\_\_\_

\_\_\_\_\_

**Specialist's ID number:**
